# Supplementary material for: The evolutionary landscape of chronic lymphocytic leukemia treated with ibrutinib targeted therapy
Source: PubMed Central journal article supplement (PMC5736707; doi:10.1038/s41467-017-02329-y), 2017-12-19
Supplement: 41467_2017_2329_MOESM1_ESM.pdf [file 41467_2017_2329_MOESM1_ESM.pdf]

# Supplementary Information

## Supplementary Figures

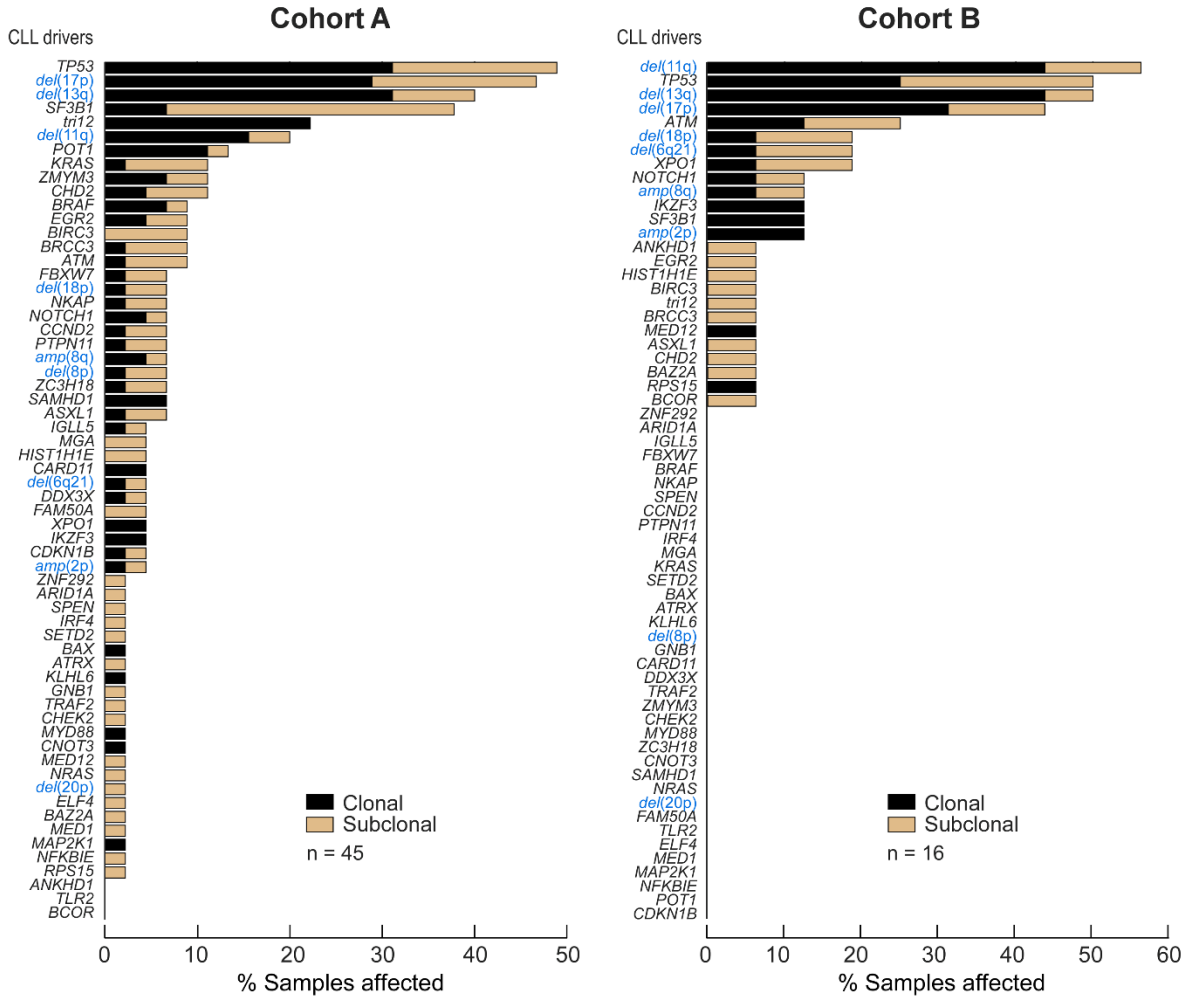

**Supplementary Figure 1.** Clonal and subclonal status of putative driver mutations in cohorts A and B. Distribution of clonal (black) and subclonal (tan) putative driver mutations and copy number alterations (blue font) across the two patient cohorts.

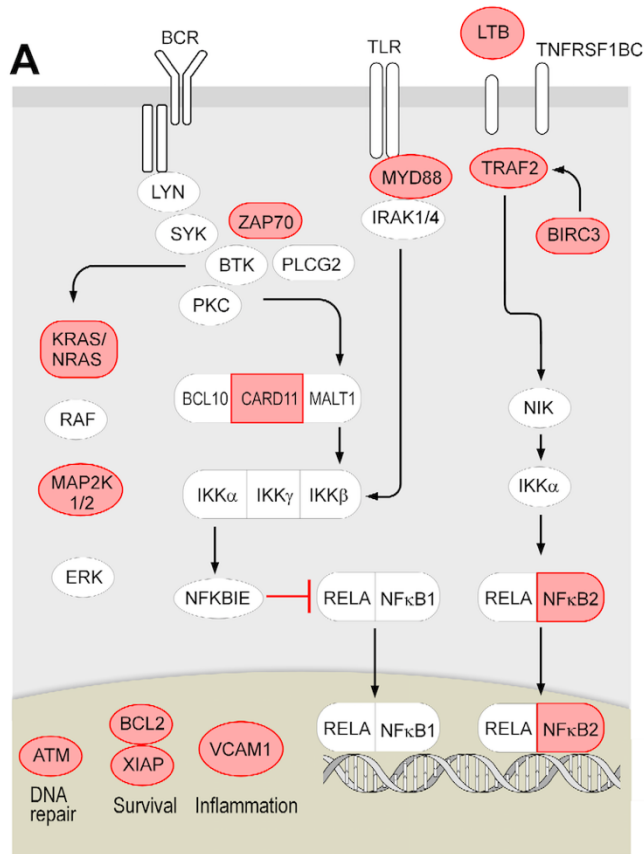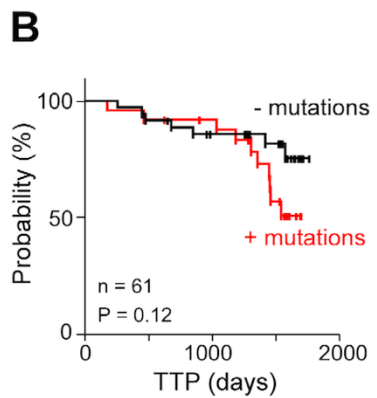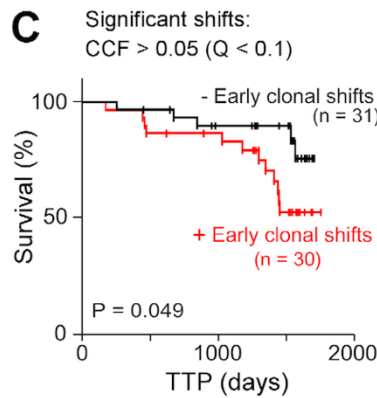

**Supplementary Figure 2.**

Somatic mutations in the BCR and NF-κB pathways identified in Cohorts A and B, and time-to-progression analysis in relation to presence of these mutations. (a) Somatic mutations in members of the BCR and NF-κB pathways (pink), identified by analysis of WES of 61 pretreatment CLL samples. (b) Kaplan-Meier plot of time-to-progression separated by the presence (red) or absence (black) of BCR and NF-κB pathway mutations. (c) Kaplan-Meier plot of time to progression separated by the presence (red) or absence (black) of early clonal shifts (CCF >0.05 with Q value <0.1).

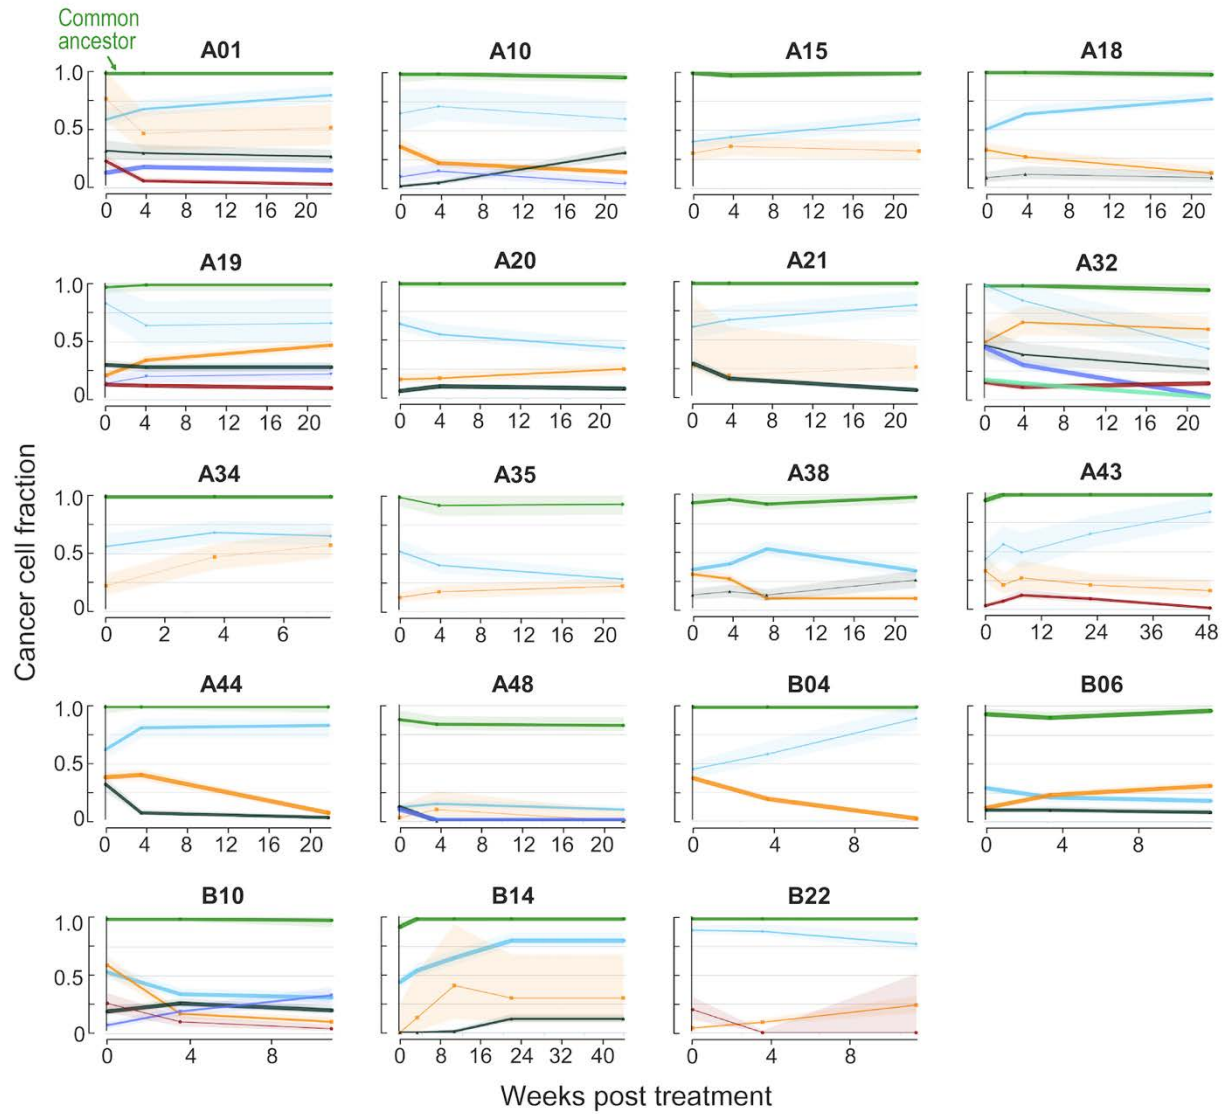

**Supplementary Figure 3.** Clonal change in CCF over time in 19 CLLs treated with ibrutinib *with* statistically significant early clonal shifts. The CCF mode is calculated per clone/timepoint based on SNV data. The shaded area represents a 95% CI.

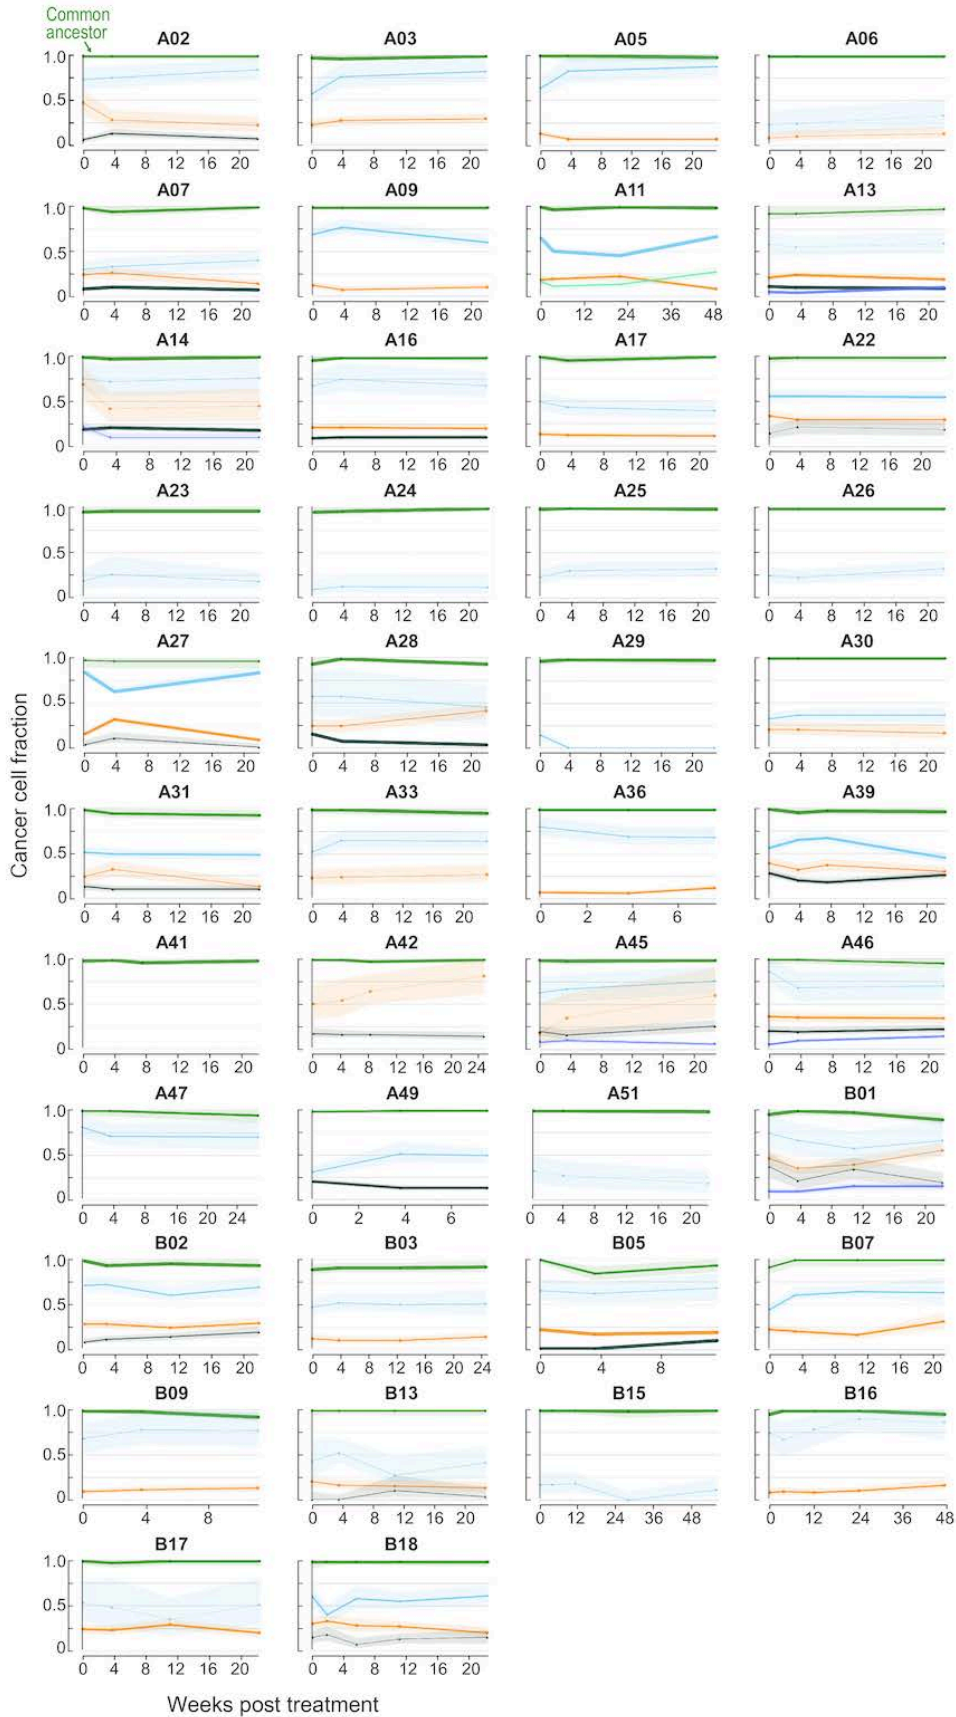

**Supplementary Figure 4.** Clonal change in CCF over time in 42 CLLs treated with ibrutinib *without* statistically significant early clonal shifts. The CCF mode is calculated per clone/timepoint based on SNV data. The shaded area represents a 95% CI. We note that this group contains cases which appear to have some shifts that either did not reach statistical significance due to measurement uncertainty (wide CI, e.g., A42) or due to fluctuations over the treatment period (e.g., A27) that did not result in a significant change comparing the first and last observation.

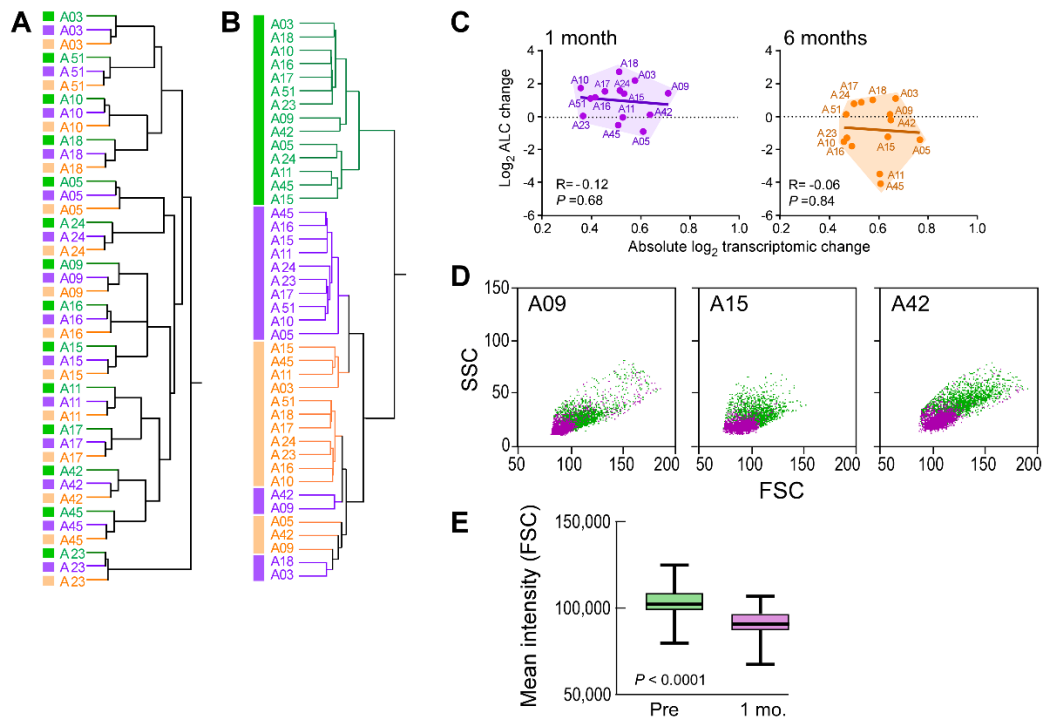

**Supplementary Figure 5.** Transcriptomic changes of Cohort A samples on ibrutinib treatment.

(a) Hierarchical clustering of samples based on principal component analysis (PCA) across 14 patients and three time points (pre [green], 1 month post-treatment initiation [purple] and 6 months post-treatment initiation [orange]). Sample names are indicated (e.g., 'A15'). (b) Hierarchical clustering of samples by PCA corrected for inter-patient variability. (c) Lack of correlation between change in absolute lymphocyte count to change in gene expression across all coding genes, following 1 month (left,  $R=-0.12$ ;  $P=0.68$ ) and 6 months (right,  $R=-0.06$ ;  $P=0.84$ ) on therapy. R- and P-values determined by Pearson correlation. (d) Representative FACS scatter plots with overlay of pre (green) vs 1 month post (purple) cells, showing decrease size with treatment based on side (SSC) and forward (FSC) scatter, gated on live cells. Analyzed on a FACS Canto II flow cytometer (BD Biosciences) using FACS-DIVA 6.1.1 and FlowJo (Version 10, TreeStar). (e) Change in mean FSC (+/- standard error of mean) at pre-treatment (green) and 1 month post treatment initiation (purple, n=9). P-values determined by a paired student t-test.

## Supplementary Tables

**Supplementary Table 1: Cohorts**

|                     | <b>N (%) or<br/>Median (range)</b> | <b>Cohort A<br/>(WES)</b> | <b>Cohort A<br/>(RNA-seq)</b> | <b>Cohort B<br/>(WES)</b> |
|---------------------|------------------------------------|---------------------------|-------------------------------|---------------------------|
| Patient number      |                                    | 45                        | 14                            | 16                        |
| Age                 | 65 (33-85)                         | 66 (33-85)                |                               | 63 (35-78)                |
| Male gender         | 38 (62%)                           | 27 (60%)                  |                               | 11 (69%)                  |
| Rai stage           |                                    |                           |                               |                           |
| 0                   | 1 (2%)                             | 0 (0%)                    |                               | 1 (6%)                    |
| 1                   | 12 (20%)                           | 9 (20%)                   |                               | 3 (19%)                   |
| 2                   | 10 (16%)                           | 8 (18%)                   |                               | 2 (13%)                   |
| 3                   | 10 (16%)                           | 8 (18%)                   |                               | 2 (13%)                   |
| 4                   | 28 (46%)                           | 20 (44%)                  |                               | 8 (50%)                   |
| Unmutated IGHV      | 39 (64%)                           | 27 (60%)                  | 9 (64%)                       | 12 (75%)                  |
| FISH                |                                    |                           |                               |                           |
| Deletion 17p        | 32 (52%)                           | 25 (56%)                  | 8 (57%)                       | 7 (44%)                   |
| Deletion 11q        | 18 (30%)                           | 9 (20%)                   |                               | 9 (56%)                   |
| Trisomy 12          | 8 (13%)                            | 7 (16%)                   |                               | 1 (6%)                    |
| Deletion 13q        | 33 (54%)                           | 22 (49%)                  |                               | 11 (69%)                  |
| Relapsed/refractory | 34 (56%)                           | 19 (42%)                  | 8 (57%)                       | 15 (94%)                  |

**Supplementary Table 2: Progressive disease cases**

| Patient ID | Age | Sex | FISH             | IGHV | Treatment Status <sup>1</sup> | Treatment | Best Response <sup>2</sup> | Time to Progression (Months) | Pathology at Progression          |
|------------|-----|-----|------------------|------|-------------------------------|-----------|----------------------------|------------------------------|-----------------------------------|
| MDAC-0022  | 35  | F   | 11q del          | U    | RR                            | Ib + R    | PR                         | 6                            | CLL                               |
| NHLBI-0042 | 66  | M   | Del 17p, Del 13q | U    | RR                            | Ib        | SD                         | 9                            | Diffuse large B-cell lymphoma     |
| NHLBI-0003 | 66  | F   | Del 17p          | U    | RR                            | Ib        | PRL                        | 15                           | Hodgkin-like cells mixed with CLL |
| NHLBI-0034 | 56  | M   | Del 17p          | U    | TN                            | Ib        | PR                         | 15                           | Diffuse large B-cell lymphoma     |
| MDAC-0006  | 73  | F   | 17p del, 13q del | U    | RR                            | Ib + R    | PR                         | 16                           | CLL                               |
| MDAC-0018  | 78  | F   | 13q del, 17p del | U    | RR                            | Ib + R    | PR                         | 23                           | CLL                               |
| NHLBI-0006 | 77  | M   | Tri 12, Del 13q  | U    | RR                            | Ib        | PR                         | 28                           | CLL                               |
| MDAC-0010  | 58  | M   | 11q del, 17p del | U    | RR                            | Ib + R    | PR                         | 34                           | CLL                               |
| NHLBI-0011 | 62  | F   | Del 17p          | U    | RR                            | Ib        | PR                         | 39                           | CLL                               |
| NHLBI-0043 | 64  | F   | Del 17p          | M    | TN                            | Ib        | PR                         | 43                           | CLL                               |
| NHLBI-0019 | 59  | M   | Normal           | M    | RR                            | Ib        | PR                         | 45                           | CLL                               |
| MDAC-0014  | 65  | M   | 17p del, 13q del | NA   | RR                            | Ib + R    | PR                         | 47                           | CLL                               |
| NHLBI-0005 | 65  | M   | Tri 12           | U    | RR                            | Ib        | PR                         | 48                           | CLL                               |
| NHLBI-0020 | 66  | F   | Del 17p          | M    | RR                            | Ib        | CR                         | 48                           | CLL                               |
| NHLBI-0021 | 61  | F   | Normal           | U    | RR                            | Ib        | CR                         | 48                           | CLL                               |
| MDAC-0003  | 56  | M   | 11q del, 13q del | NA   | RR                            | Ib + R    | PRL                        | 51                           | CLL                               |
| MDAC-0015  | 45  | M   | 13q del          | NA   | RR                            | Ib + R    | PR                         | 52                           | CLL                               |

<sup>1</sup>RR = relapsed/refractory, TN = treatment naïve

<sup>2</sup>PR = partial response, SD = stable disease, PRL = partial response with lymphocytosis, CR = complete response



**Supplementary Table 3: Targeted BTK and PLCG2 sequencing**

| Patient ID       | Gene          | AA change | MT codon | WT codon | VAF (%)          |
|------------------|---------------|-----------|----------|----------|------------------|
| A03 <sup>2</sup> | None detected |           |          |          |                  |
| A05 <sup>2</sup> | BTK           | C481S     | TGC      | TCC      | 2.2              |
| A06 <sup>2</sup> | BTK           | C481S     | TGC      | TCC      | 78.2             |
|                  | PLCG2         | R665W     | CGG      | TGG      | 0.26             |
|                  | PLCG2         | S707Y     | TCC      | TAC      | 0.17             |
|                  | PLCG2         | L845F     | TTA      | TTT      | 4.7              |
| A11 <sup>2</sup> | None detected |           |          |          |                  |
| A19              | BTK           | C481S     | TGC      | TCC      | N/A <sup>1</sup> |
| A20              | BTK           | C481S     | TGC      | TCC      | 43.7             |
| A21              | PLCG2         | R665W     | CGG      | TGG      | N/A <sup>1</sup> |
| A34 <sup>2</sup> | PLCG2         | R665W     | CGG      | TGG      | 0.11             |
| A42 <sup>2</sup> | None detected |           |          |          |                  |
| A43 <sup>2</sup> | None detected |           |          |          |                  |

<sup>1</sup>VAF not available as only Sanger sequencing performed

<sup>2</sup>Previously reported in Ahn et al.
