# Supplementary material for: The evolutionary landscape of chronic lymphocytic leukemia treated with ibrutinib targeted therapy
Source: PubMed Central journal article supplement (PMC5736707; doi:10.1038/s41467-017-02329-y), 2017-12-19
Supplement: 41467_2017_2329_MOESM2_ESM.pdf [file 41467_2017_2329_MOESM2_ESM.pdf]

## **Description of Supplementary Files**

File Name: Supplementary Data 1

Description: Sequencing metrics of the WES data generated from Cohorts A and B

File Name: Supplementary Data 2

Description: Summary of the CLL driver mutations identified in the baseline pretreatment CLL samples from Cohorts A and B

File Name: Supplementary Data 3

Description: Summary of the CLL copy number alterations identified in the baseline pretreatment CLL samples from Cohorts A and B

File Name: Supplementary Data 4

Description: Summary of the mutations in the BCR and NF-kB pathways identified in the baseline pretreatment CLL samples from Cohorts A and B

File Name: Supplementary Data 5

Description: Differentially expressed genes when comparing pre-treatment RNA sequencing with RNA sequencing at 1 and 6 months.

File Name: Supplementary Data 6

Description: Differentially expressed gene set enrichment when comparing pre-treatment RNA sequencing with RNA sequencing at 1 and 6 months.
